# Supplementary material for: Helicobacter Pylori Virulence Factor Cytotoxin-Associated Gene A (CagA) Induces Vascular Calcification in Coronary Artery Smooth Muscle Cells
Source: MDPI journal article supplement (doi:10.3390/ijms24065392), 2023-03-11
Supplement: s1 [file s1]

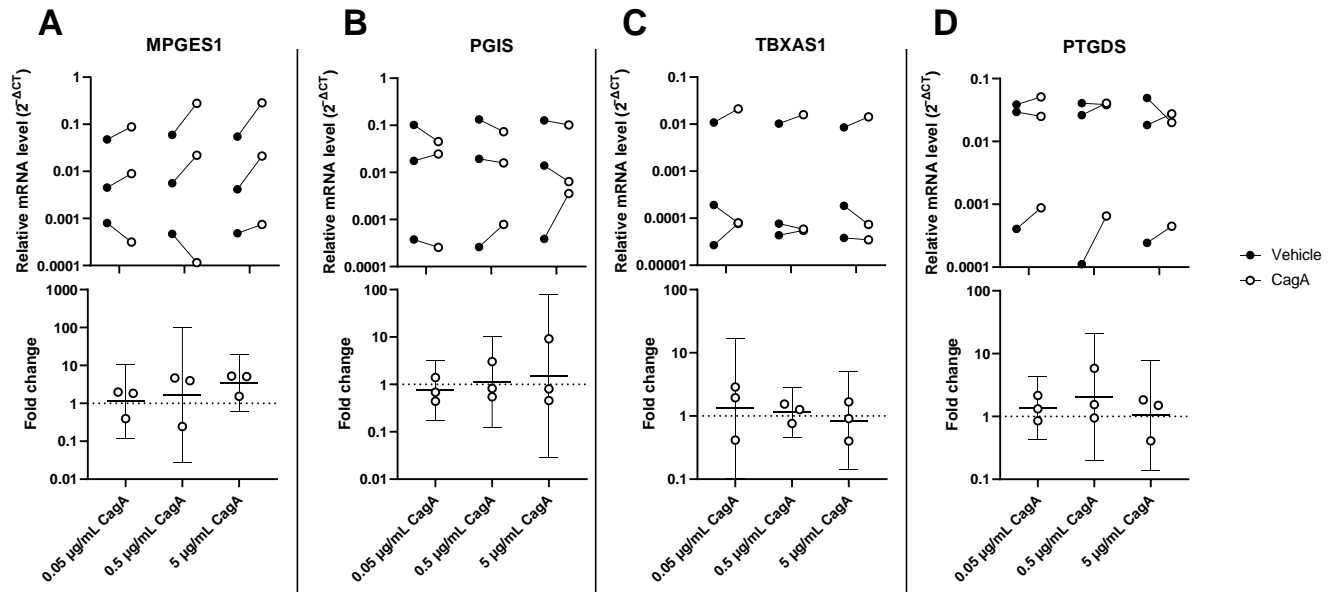

**Supplemental Figure S1. Expression of downstream prostanoid synthases in coronary artery smooth muscle cells (CASCs) stimulated by Cytotoxin-associated gene A (CagA)**

Expression of microsomal prostaglandin E<sub>2</sub> synthase-1 (MPGES1) (A), prostaglandin I<sub>2</sub> synthase (PGIS) (B), thromboxane A<sub>2</sub> synthase (TXAS1) (C), and prostaglandin D<sub>2</sub> synthase (PTGDS) (D) was measured by qPCR in CASCs following CagA stimulation.  $n = 3$  samples with paired vehicle controls. Upper panels display relative expression to glyceraldehyde 3-phosphate dehydrogenase (GAPDH) calculated as  $2^{-\Delta CT}$ . Lower panels show fold change with mean and 95% confidence intervals.
